# Supplementary material for: RNF41 regulates the damage recognition receptor Clec9A and antigen cross-presentation in mouse dendritic cells
Source: eLife. 2020 Dec 2;9:e63452. doi: 10.7554/eLife.63452 (PMC7710356; doi:10.7554/eLife.63452)
Supplement: Figure 1—source data 1. [file elife-63452-fig1-data1.xlsx]

## Sheet: Figure 1
Tullett et al.
Figure 1 Source data: Clec9A binding to RNF41
Figure 1A: mouse Clec9A binds to the RNF41 C-terminal domain
	mClec9A			mClec12A
RNF41-C	1.6065	1.6715	1.5262	0.0585	0.0275	0.0556
RNF41-RBC	0.0585	0.0495	0.0556	0.052	0.027	0.0494
GST	0.074	0.0485	0.0703	0.0615	0.027	0.0584
Figure 1B: mouse Clec9A binds to the RNF41 C-terminal domain
Clec-ecto concentration (nM)	mClec9A to RNF41-C			mClec9A to RNF41-RBC			mClec9A to GST			mClec12A to RNF41-C			mClec12A to RNF41-RBC			mClec12A to GST
370.4	1.6065	1.6715	1.5262	0.0585	0.0495	0.0556	0.074	0.0485	0.0703
123.467	0.792	0.835	0.7524	0.0535		0.0508	0.057		0.0542
41.1556	0.345	0.3225	0.3278	0.049		0.0466	0.055		0.0523
13.7185	0.153	0.138	0.1454	0.05		0.0475	0.0655		0.0622
4.57284	0.085	0.0705	0.0808	0.0515		0.0489	0.055		0.0523
1.52428	0.0635		0.0603	0.0515		0.0489	0.0535		0.0508
367.1										0.0585	0.0275	0.0556	0.052	0.027	0.0494	0.0615	0.027	0.0584
122.367											0.0255
40.7889											0.0245
13.5963											0.0255
4.5321											0.0265
Figure 1C: Mouse Clec9A binding to RNF41 is enhanced at low pH
pH	Clec12A to RNF41			Clec9A to RNF41
4	0.0819	0.0051	0.0065	2.15345	1.6404	2.3372
5	-0.00635	0.00545	0.0013	1.95245	2.0803	1.8762
6	0.01105	0.00185	-0.00395	2.37025	2.169	1.3816
6.8	0.03635	0.00175	0.01795	1.64135	1.1923	1.31445
7.4	-0.06285	-0.0029	-0.0206	1.3417	0.6409	0.985
8	-0.09455	-0.00975	-0.0088	1.15405	0.41695	0.74055
Figure 1D: Mouse Clec9A binding to RNF41 is enhanced at low pH
Clec-ecto concentration (nM)	mClec9A to RNF41 pH7.4		mClec9A to Actin pH7.4		mClec9A to RNF41 pH5		mClec9A to Actin pH 5		mClec12A to RNF41 pH7.4		mClec12A to Actin pH7.4		mClec12A to RNF41 pH5		mClec12A to Actin pH 5
185.2	0.9921	1.0623			1.5438	1.4834
92.6	0.7218	0.791			1.58935	1.58085
46.3	0.43645	0.50115			1.70905	1.72855
23.15	0.27475	0.29315			1.47955	1.44265
11.575	0.12695	0.13835			0.93705	0.95645
5.7875	0.05445	0.07015			0.46965	0.51645
2.89375	0.01395	0.01895			0.19165	0.18785
1.44687	-0.01035	-0.00645			0.02295	0.03955
14.816			1.33445	1.50375			1.29755	1.36165
7.408			1.26535	1.89775			1.51075	1.31515
3.704			1.38325	1.71645			1.44015	1.50215
1.852			1.05495	1.22475			1.22915	1.27315
0.926			0.92445	0.89415			1.27255	1.04935
0.463			0.63105	0.67685			0.91945	0.94185
0.2315			0.43245	0.39855			0.58515	0.64315
0.11575			0.27925	0.21715			0.34695	0.33705
0.057875			0.12565	0.13155			0.11285	0.13445
183.55									0.19455	0.20585			0.3566	0.3153
91.775									0.1103	0.1001			0.238	0.1774
45.8875									0.061	0.0567			0.1679	0.1153
22.9438									0.0183	0.0153			0.1313	0.115
11.4719									-0.0095	0.0042			0.0731	0.0715
5.73594									-0.0061	0			0.0698	0.0296
2.86797									-0.0046	0.0013			0.037	0.0339
1.43398									-0.0092	-0.0009			0.0319	0.0262
14.684											0.0585	0.0532			0.0841	0.0248
7.342											0.0453	0.0545			0.0454	0.0337
3.671											0.044	0.0425			0.0536	0.0528
1.8355											0.026	0.0431			0.0589	0.046
0.91775											0.0551	0.0477			0.0598	0.0339
