# Supplementary material for: RNF41 regulates the damage recognition receptor Clec9A and antigen cross-presentation in mouse dendritic cells
Source: eLife. 2020 Dec 2;9:e63452. doi: 10.7554/eLife.63452 (PMC7710356; doi:10.7554/eLife.63452)
Supplement: Figure 2—source data 1. [file elife-63452-fig2-data1.xlsx]

## Sheet: Figure 2
Tullett et al
Figure 2 Source data: RNF41 knockdown: RNF41 expression and Ag presentation
Figure 2C: RNF41 knockdown - Reduced RNF41 expression by qPCR
	Non-silencing	shRNA #5	shRNA #10
Exp 1	1	0.304603	0.362236
Exp 2	1	0.245705	0.346277
Exp-3	1	0.1539	0.4796
Figure 2D: RNF41 knockdown: OT-I proliferation relative to non-silencing control
	Non-silencing	shRNA #5	shRNA #10
	100	143.177	259.711
	100	128.563	125.676
	100	125.725	91.559
	100	277.509	116.747
	100	183.031	89.52
	100	141.215	140.935
Figure 2E: RNF41 knockdown: OT-II proliferation relative to non-silencing control
	Non-silencing	shRNA #5	shRNA #10
	100	101.868	154.684
	100	195.404	129.919
	100	117.214	95.199
	100	289.511	138.924
	100	198.163	116.091
	100	116.025	113.679
