# Supplementary material for: RNF41 regulates the damage recognition receptor Clec9A and antigen cross-presentation in mouse dendritic cells
Source: eLife. 2020 Dec 2;9:e63452. doi: 10.7554/eLife.63452 (PMC7710356; doi:10.7554/eLife.63452)
Supplement: Figure 3—source data 1. [file elife-63452-fig3-data1.xlsx]

## Sheet: Figure 3
Tullett et al
Figure 3 Source data: RNF41 regulation of Clec9A
Figure 3F: RNF41 regulates newly synthesised and mature Clec9A
	Mature				Newly synthesised
Clec9A only	1	1	1	1	0.192838	0.153066	0.0908292	0.169659
Clec9A+RNF41	0.488091	0.436371	0.480014	0.413769	0.0786716	0.0599831	0.0353756	0.0450139
Clec9A+RNF41 delta RING	0.943328	1.38886	0.776159	0.625862	0.132941	0.175231	0.0489957	0.0799397
Clec9A only+BfA	0.185923	0.257895	0.343334	0.260156	0.466737	0.685675	0.350238	0.646278
Clec9A+RNF41+BfA	0.196497	0.223518	0.279648	0.134287	0.287633	0.284451	0.20406	0.283651
Clec9A+RNF41 dellta RING+BfA	0.194238	0.318383	0.311597	0.331021	0.637149	0.703709	0.333054	1.01126
