# Supplementary material for: RNF41 regulates the damage recognition receptor Clec9A and antigen cross-presentation in mouse dendritic cells
Source: eLife. 2020 Dec 2;9:e63452. doi: 10.7554/eLife.63452 (PMC7710356; doi:10.7554/eLife.63452)
Supplement: Figure 4—source data 1. [file elife-63452-fig4-data1.xlsx]

## Sheet: Figure 4
Tullett et al
Figure 4 source data: RNF41 mediates ubiquitination of mouse and human Clec9A
Figure 4A: RNF41 mediates mClec9A ubiquitination
mClec9A	mClec9A+RNF41	mClec9A + RNF41deltaRING
1	3.52931	1.57618
1	9.06353	1.81628
1	3.88748	1.29839
1	4.96789	1.68058
1	2.04725	0.6079
1	3.36251	1.23434
1	7.17177	1.78947
1	6.0157	1.72268
1	5.40043	0.873547
1	3.86514	1.36723
Figure 4B: RNF41 mediates hCLEC9A ubiquitination
hCLEC9A	hCLEC9A+RNF41	hCLEC9A + RNF41deltaRING
1	2.01209	0.656114
1	3.81853
1	6.87718
1	1.72077	0.52167
1	3.32362	1.97076
1	5.57294	1.08705
1	2.48797	1.49742
