# Supplementary material for: RNF41 regulates the damage recognition receptor Clec9A and antigen cross-presentation in mouse dendritic cells
Source: eLife. 2020 Dec 2;9:e63452. doi: 10.7554/eLife.63452 (PMC7710356; doi:10.7554/eLife.63452)
Supplement: Figure 5—source data 1. [file elife-63452-fig5-data1.xlsx]

## Sheet: Figure 5
Tullett et al
Figure 5 source data: Clec9a interactions are regulated in the presence of dead cells
	Figure 5A: dead cell uptake 4h			Figure 5C: dead cell uptake 4h			Figure 5C: dead cell uptake 4h			Figure 5C: dead cell uptake 4h			Figure 5C: dead cell uptake 4h			Figure 5D: dead cell uptake 4h			Figure 5E: Dead cell overlap with PLA 4h
	PLA: Clec9A+RNF41			PLA: Clec9A+Calnexin			PLA: Clec9A+Calreticulin			PLA: Clec9A+Erlin			PLA: Clec9A+Ub			Clec9A ubiquitination by IP
	No dead cells	dead cells		No dead cells	Dead cells		No dead cells	Dead cells		No dead cells	Dead cells		No dead cells	Dead cells		No dead cells	Dead cells		PLA Clec9A+Erlin2 with dead cells	PLA Clec9A+Calreticulin with dead cells	PLA Clec9A + Calnexin with dead cells
	316.369	1736.73		15997.4	14925.8		12017.1	9454.1		3402.51	4631.13		4090.89	3683.02		1	0.2572		24.5	27.5	3.8
	1160.87	500.865		20665.2	10515.6		5699.83	13678.8		6854.67	2728.23		5412	2543.04		1	0.2869		1.2	23	7.3
	3569.75	1232.88		9659.81	3923.62		8821.46	9946.83		5385.52	8548.79		7765.92	3119.02		1	0.2242		6.5	31.4	5.8
	35.5782	2794.06		13543.8	10237.8		7054.33	18793.6		5024.62	7077.72		2227	2399.94		1	0.353		4.6	47	6.9
	595.03	1828.98		16201.1	9131.67		8855.93	13342.2		2836.67	2254.85		2455	1805.89					11.1	40.5	10
	996.616	2792.14		10725.4	8319.55		14262.8	9703.51		2928.07	4377.83		2823.99	2045.02					24.2	28.9	14.3
	1835.15	2280.2		13898.7	16584.3		10106	7733.61		5326.72	6237.05		5587.04	807.965					37.7	16	1
	668.104	807.008		5368.26	8633.79		6584.92	8904.6		10140.4	2298.31		8980.92	2738.89					15.1	24	1.5
	2121.91	2026.68		12792.6	10399.1		9367.92	9771.43		6182.3	2768.71		1043.95	864.071					44.8	42.1	4.6
	1212.64	910.334		8500	18311.1		4959.73	8265.87		6577.71	4743.83		2560.06	386.016					28.6	68.9	3.6
	1400.12	939.734		9234.15	9357.71		2352.12	20317.4		6969.07	2320.68		6794.05	1151.95					28.5	40.5	1.7
	586.082	3100.42		11876.1	5815.44		4456.86	10071.5		6569.61	6094.1		4523.98	1435.01					26.9	45.1	3.5
	1374.77	1996.21		15567.5	6573.66		17362.1	6353.76		8904.57	4541.02		6696.97	3455.02					39.8	58.9	3.6
	1378.82	694.521		13551	11715.9		11853.9	28810.4		6389.17	1721.6		5595.03	2702.95					16.3	45.7	1.3
	2259.75	642.751		5475.85	8355.13		13872.4	12142.8		4775.15	1686.02		4245.97	5177.91					48.4	51	12.1
	235.2	1026.02		9607.18	10857.3		5483.88	9117.5		8474.65	1785.3		4099.92	6565.01					53.4	67	2.9
	502.782	908.416		5181.64	6430.71		8930.96	7739.69		8259.69	2339.85		5131.89	3154.95					29	21	2.4
	183.43	348.752		9034.31	7445.65		10802.5	18672		6775.41	2092.51		2365.9	1934.91					39.9	31.6	8
	1151.71	524.086		9984.27	14099.4		11973.5	13066.4		10140.4	2920.82		3008.91	3626.91					39.2	35.7	6.1
	876.886	399.456		11003.3	6521.04		10105	15283.7		6575.79	2913.79		6534.96	1676.03					27.4	49.8	1.9
	3541.42	1153.84		12034.4	7426.47		9786.64	14254.7		6578.77	1486.19		4096.98	4699.02					59.3	63.3	3.1
	1520.7	1396.07		9536.24	10130.2		13850.1	15090.1		7569.43	3984.33		8204.89	5361.99					26.5	30.7	48.8
	2523.5	1742.69		6810.99	15253.3		10061.4	13300.6		9144.88	2196.9		7283.88	3233.96					24.2	38.7	2.2
	5212.1	2481.95		18794.7	12529.1		20821.3	9792.72		5063.19	4028.01		8879	1176.96					36.6	34.4	3.3
	1471.06	651.912		10665.6	12084.9		9550.42	17117.8		3987.53	2431.25		9672.05	2046.07					13.9	37.5	1.4
	1807.67	628.477		17976.4	4897.86		8855.93	14511.2		5676.54	2434.23		5895.94	2975.92					16	45.3	3.5
	1711.38	1197.3		9664.92	6645.67		11668.3	10165.8		7332.1	2971.53		9647.88	1977.99					13	51.3	2.5
	1064.58	1406.3		14334.6	7631.21		9529.12	12560.5		4471.99	2260.81		7100.01	4119.05					11.5	30.8	2
	670.234	1916.11		15276.5	17695.6		8575.1	20663.2		9094.18	2669.43		4745.04	1582.94					11.3	67	1.3
	1074.59	1870.52		12366.7	10164.7		10449.7			7236.86	1484.27		4754.91	1481.02					10.6	30	3.6
	2810.47	1158.74		17900.3	11712.9		12937.7			8770.78	2144.28		7646.99	2233.93					8.1	50.2	5.8
	490.639	1157.89		21043.3	8497.02		208.852			4829.9	1084.82		6512.05	2472.02					17.1	52.3	0.6
	476.578	1395.01		14357	8945.05		9264.51			5981.61	1314.9		13002	2953.01					17.8	38.5	0.6
	3265.53	392.426		14065.1	5248.75		12249.3			8515.34	2011.55		7227.98	3922.99					12.5	23.7	1.9
	5819.49	876.886		12236.1	11134.9		9346.63			7830.83	4324.99		3900.93	1796.02					11.9	30.2	1.1
	4156.69	1134.46		12047.4	10701.2		9365.9			3643.68	5433.24		3920.89	1465.05					8.4	7.6	1.9
	1471.06	330.43		9898.2	14680.4					7809.53			2312.95	1466.95					6.9	5	1.6
	578.838	4285.58			5982.68					3389.3			6706.01	2342.99					18.7	5.1	2.9
	1870.52	2276.15			5256.84					2877.36			3920.05	2017.08					17.1	3.3	3.1
	4134.53	881.999			8441.2					7236.86			4046.97	1494.89					11.6	21.4	0.6
	2893.55	2081.43			3533.32					3698.43			3224.93	1917.05					12.2	40.5	0.5
	6830.17	54.7521			8441.2					3552.5			1496.99	1611.1					6.1	25	2.7
	5957.33	131.874			5945.18					3141.96			4602.99	1618.03					5.1	3.9	0
	1638.3	8.09564			4493.29					3349.68			4799.04	1856.95					3.2	18	0
	3827.32	312.321			10220.5					2100.61			7306.99	1901.08					1.2	32.6	1
	5254.71	401.586			6449.03					2497.08			7006.92	1063.91					1.1	31	1
	4494.36	106.522											6869.91	1159.1					1.3	19.2	0
	4437.48	138.904											3481.92	1609					0	47.8	37
	7364.48	422.678											6636.03	1263.96					0	0.3	1.6
	8348.95	918.642											3716.01	1419.04					0.1	0.4	1
	3928.73	974.247											10244.9	2129.92					16.3	3.9	2.7
	2647.06	545.391											4969.88	1991.02					0	7.9	0
	1942.53	209.848											19470	3836					7.4	39.8	0
	6179.32	186.626											7242.06	3177.02					19.7	2.7	0
	4755.98	519.186											13532	2079.07					0.82	38.5	0
	5084.49	506.83											6267.88	3062.07					32.2	1.6	0
	1982.15	356.847											4090.89	3273.89					0.6	45	0.3
	3811.98	1089.93											11336.9	2823.99					2.7	47.8	0
	2091.66	700.486											4866.91	2797.09					7.7	10	0
	2309.6	658.943											11499	2597.89					97.7	19.7	0
	1473.19	231.152											5840.04	3192.99					31.3	41	0
	1706.26	395.408											6488.94	3523.95					30.5	11.1	0
	12359.7	352.8											7739.87	3017.94					14.4	22.7	0.3
	8348.95	214.961											7151.07	2856.98					7.1	16.1	0
	14949	464.434											5010.02	3735.97					94.3	5.6	0
	9241.18	298.047											4067.98	2663.03					0	23	0
	5587.27	178.53											4932.06	3481.08					1.8	24.5	0
	4201.43	904.368											11509.9	2032					0	21.9	0
	4379.74	339.591											6943.04	1619.92					1.7	29	0
	2131.07	623.577											9598.92	1417.98					1.3	2.4	0
	5124.97	210.913											3597.07	1946.05					0.2	26.9	0
	5536.57	798.912											11140	4584.07					1	43.4	0.6
	11292.1	1036.24											4552.97	5945.95					27.6	37.7	0
	6543.41	1938.48											5737.08	3249.93					50.7	15.2
	8928.85	170.222											2962.05	2664.92					4.2	11.7
	7838.07	1961.7											2842.06	3858.9					10.4	27.5
	737.13	352.8											7329.05	1437.95					1.1	0
	5135.19	1574.39											4501.91	4653					0.6	9.5
	504.912	3036.5											6749.92	1075.05					38.1	60.9
	1696.25	1547.12											5848.03	3083.93					11.8	47.9
	641.686	1379.88											9568.87	2709.05					0	61.8
	1480.22	1376.9											11543.9	4077.02					0
	5847.82	2137.25											7715.07	545.088					2.7
	1337.27	3497.74											12484.9	2489.04
	1819.82	705.599											6105.02	130.073
	1704.35	671.086											4215.92	564
	1978.11	266.73											6077.92	492.974
	3428.72	1485.34											7440	473.012
	579.904	1801.49											2708	61.9895
	761.416	1407.15											4272.02	457.041
	1658.54	88.1999											8643.02	2108.06
	906.286	113.552											8087.01	1026.92
	2395.67	1007.69											3561.98	773.924
	3727.83	283.774											7677.04	931.944
	4140.49	600.143											10177	1088.07
	1996.21	669.169											6173.95	1124.01
	785.703												7972.9	1168.98
	958.055												10471	1378.06
	1911												4298.92	2184.97
	1615.08												4825.94	1361.04
	1330.24												4902.01	964.935
	3125.77													1026.92
	2211.18													545.088
	1192.19													1697.04
	799.977													2349.93
	2988.78													2888.92
	2736.33
	1715.42
	3512.02
	2698.83
	3343.71
	683.23
